# Supplementary material for: Prospective Study of Violence Risk Reduction by a Mental Health Court
Source: Atypon-hosted journal article supplement (doi:10.1176/appi.ps.201400203), 2015-02-17
Supplement: appi.ps.201400203.ds001.pdf [file appi.ps.201400203.ds001.pdf]

 


Psychiatry Online
